# Supplementary material
Source: publisher site journal article supplement (https://www.dovepress.com/article/475633)
Supplement: Supplementary file 1 [file get_supplementary_file.php]

Supplementary Material

# Supplementary Figures and Tables

##

Supplementary Figures

Supplementary Figure 1. Quality control of single-cell data. (A) Number of genes expressed across different samples, number of RNAs expressed in different cells, and percentage of mitochondrial genes. (B) Ratio of the number of RNAs expressed to mitochondrial genes and the correlation between the number of genes and the number of RNAs. (C) Volcano plots demonstrating the number of highly variable genes. (D) Comparison of results before and after batch correction using the HARMONY algorithm. (E) Resolution dendrogram. The best cell branching occurs at a resolution of 0.4.





Supplementary Figure 2. Immune infiltration and cell communication analysis. (A) Proportions of infiltrating immune cell subpopulations in healthy and heart failure samples determined by the CIBERSORT algorithm. (B) Proportions of immune cell composition in the GSE57338 dataset. (C) Differences in immune cell infiltration between healthy and heart failure samples. (D) Number and weight of intercellular communications. (E) Receptor-ligand pairs involved in communication between different cells. *, P<0.05; **, P<0.01; ***, P<0.001; ****, P<0.0001.



Supplementary Figure 3. Correlation of hub genes with immune cells and functional enrichment analysis. (A, B) Correlation of SERPINA3 with immune cells and results of ssGSEA enrichment analysis. (C, D) Correlation of GPAT3 with immune cells and results of ssGSEA enrichment analysis. (E, F) Correlation of ANPEP with immune cells and results of ssGSEA enrichment analysis. (G, H) Correlation of FCER1G with immune cells and results of ssGSEA enrichment analysis.





Supplementary Figure 4. Changes in cardiac function in the mouse model. Histograms of (A) LVEF, (B) LVFS, (C) LVIDd, and (D) LVIDs parameters in the mouse model. Data are presented as the mean ± SEM. *, P<0.05; **, P<0.01.





Supplementary Figure 5. Correlation between expression of metabolism-related genes, (A) CRYM, (B) SLC2A4, (C) ATP1A3, (D) LRRC39, (E) RBFOX1, (F) SPHKAP, (G) PFKM, (H) KLHL38, (I) ASB15, and (J) MYOM2, and left ventricular ejection fraction.

**
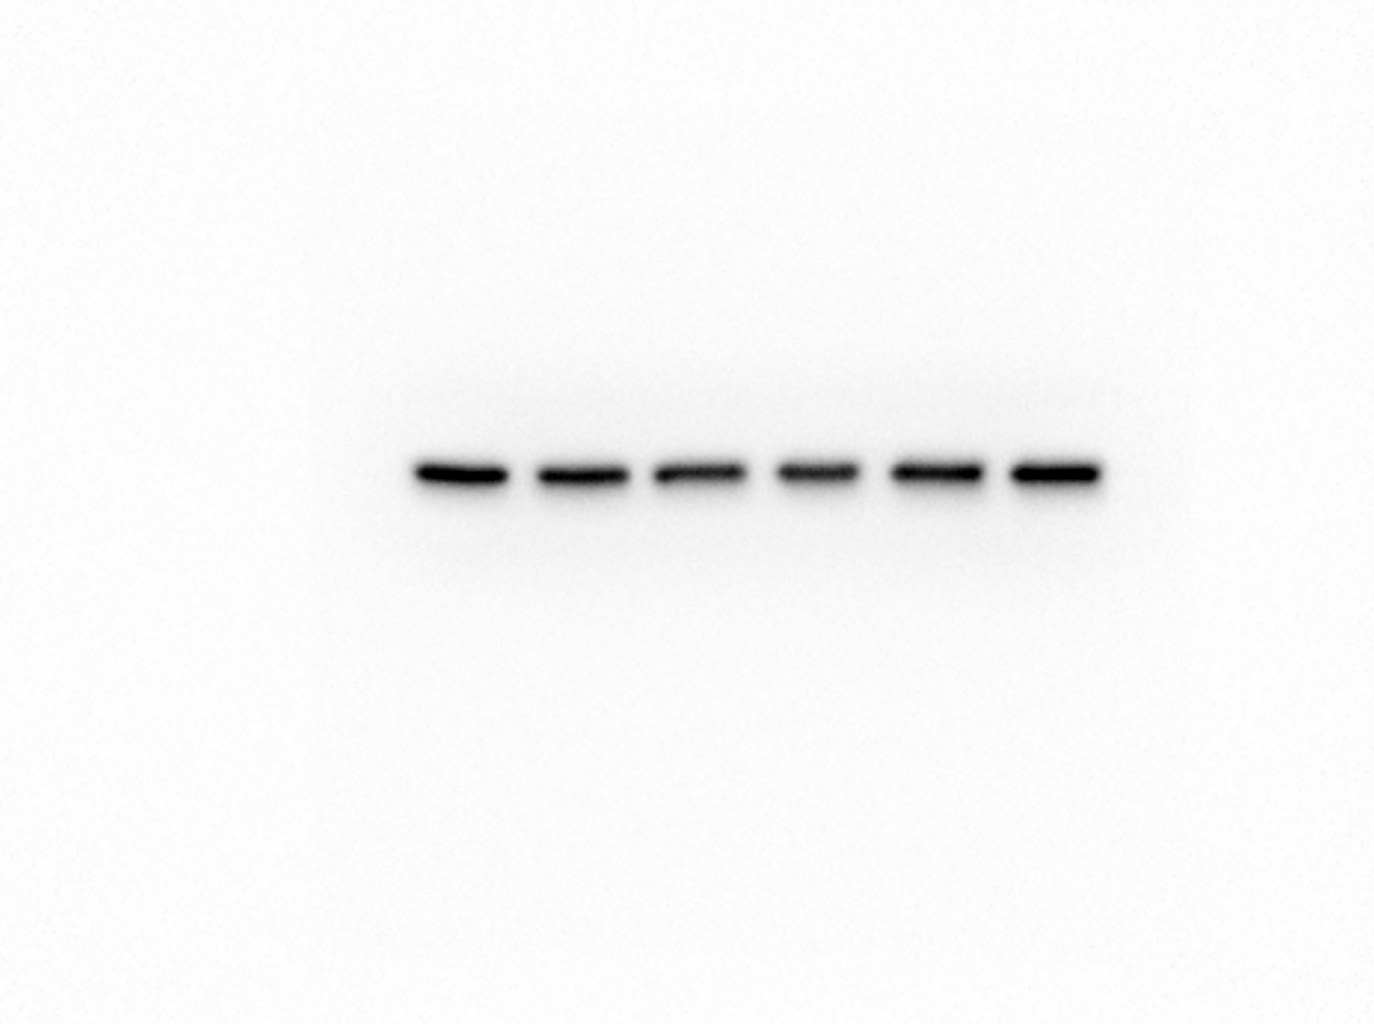
**

Gel bands of GAPDH.


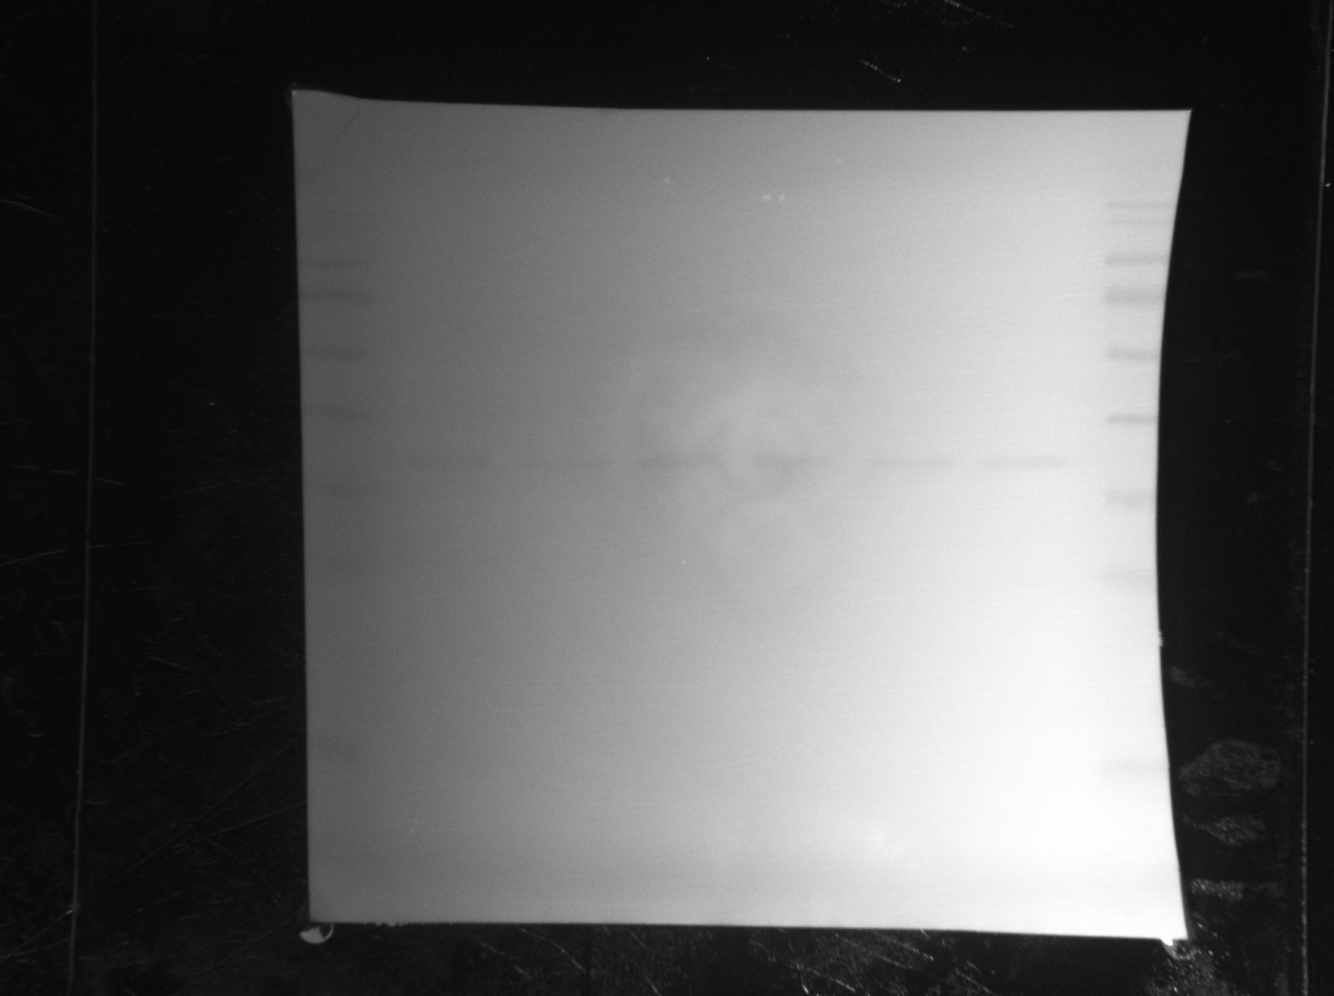


Gel bands of GAPDH’s marker.


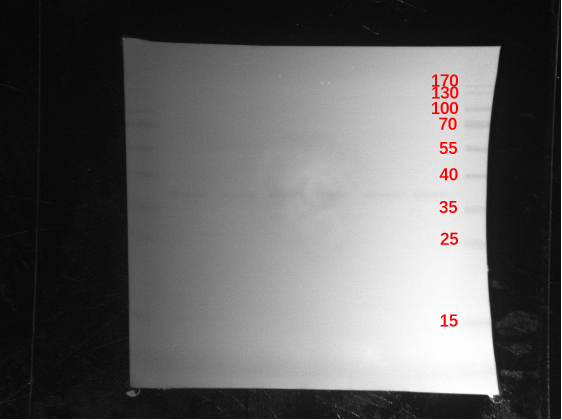


Gel bands of GAPDH’s marker with label.


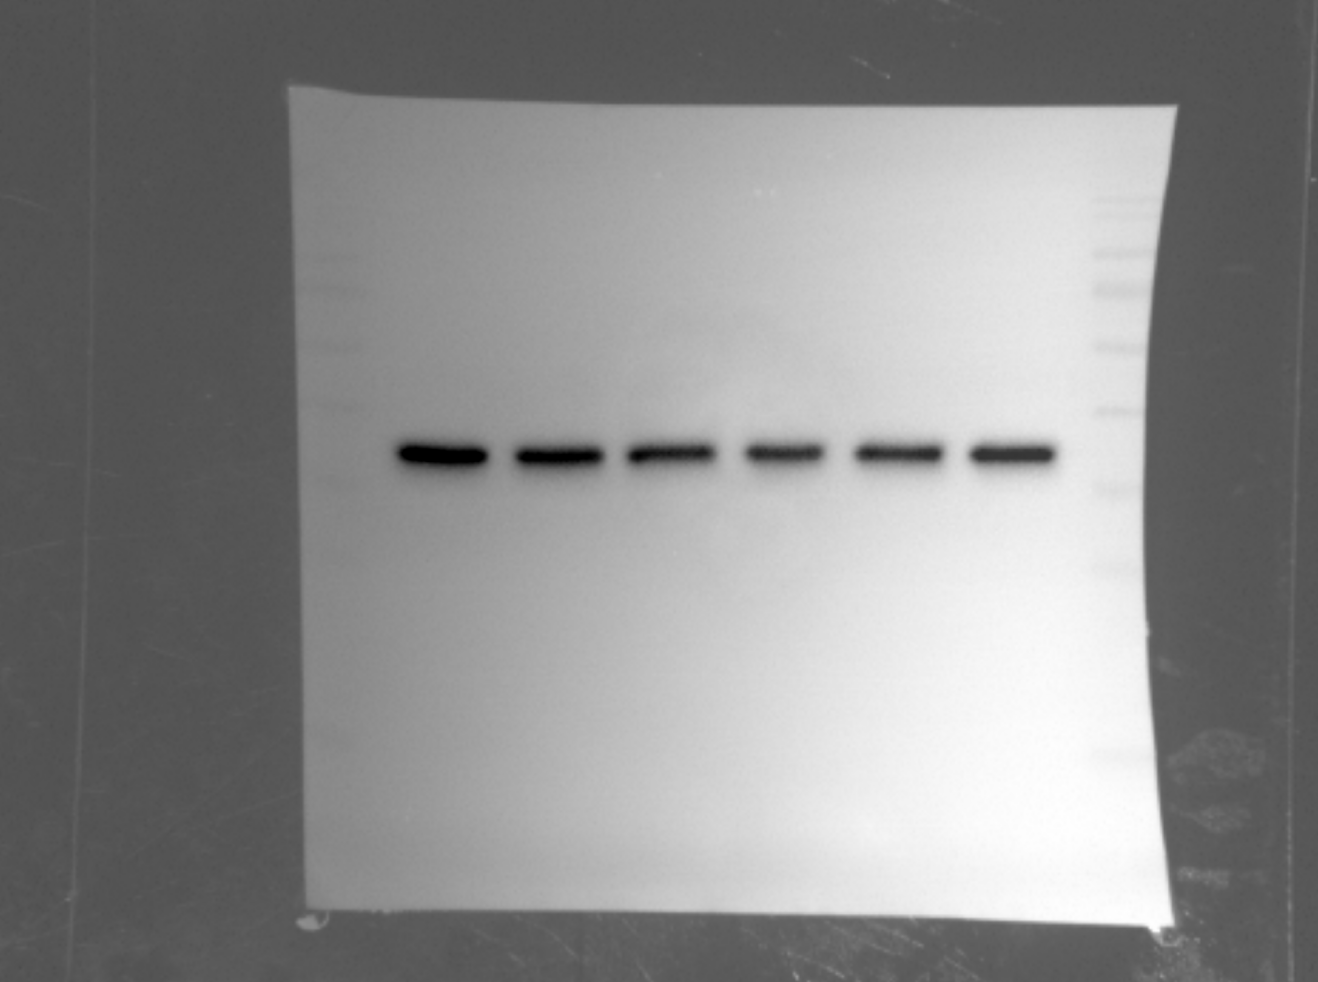


Gel bands of GAPDH merged with marker.


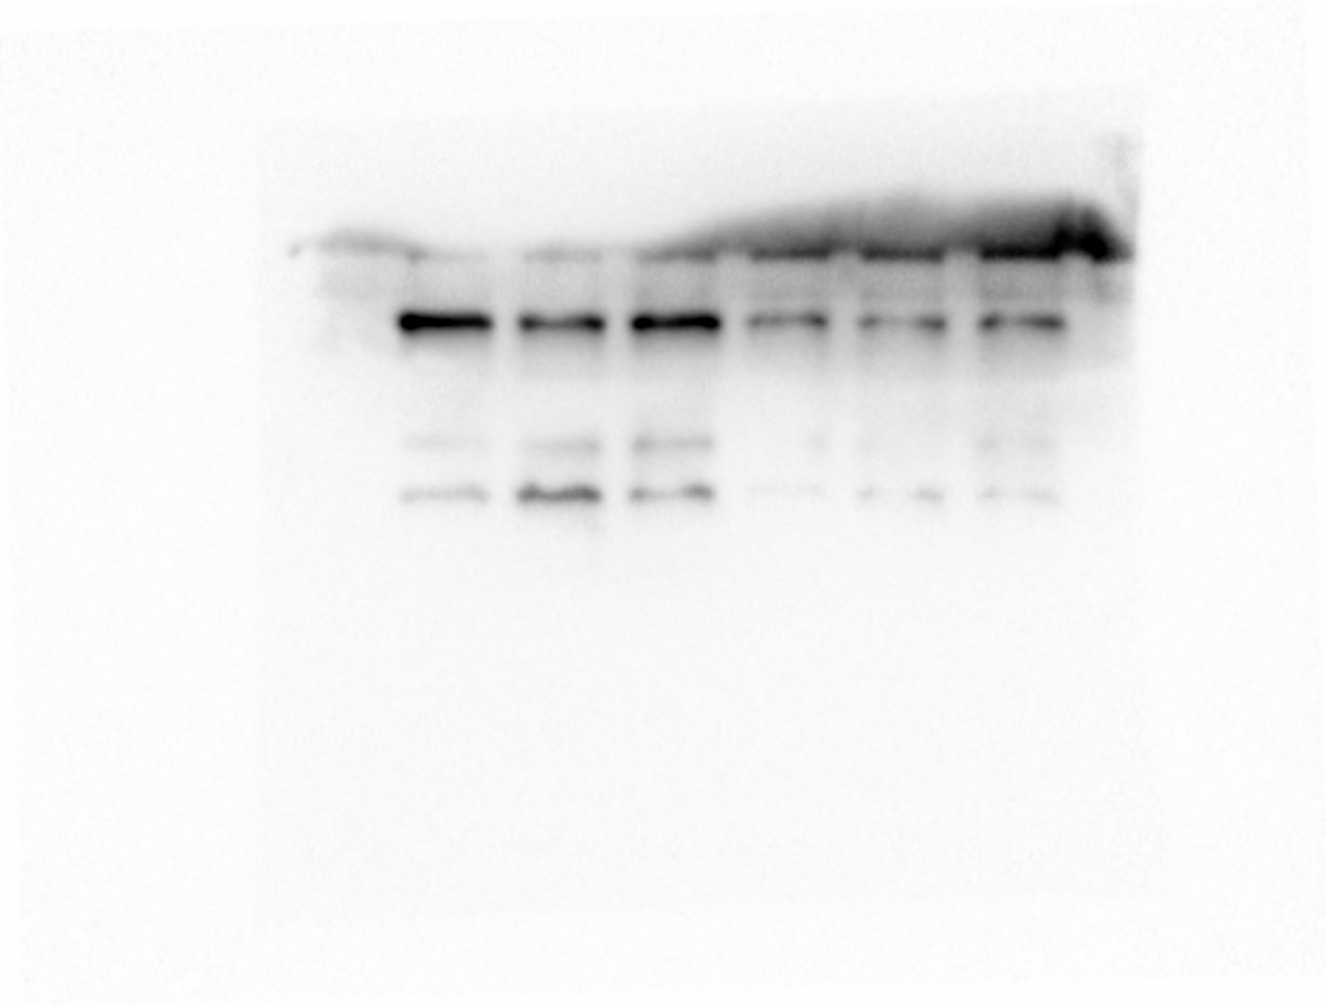


Gel bands of SERPINA3.


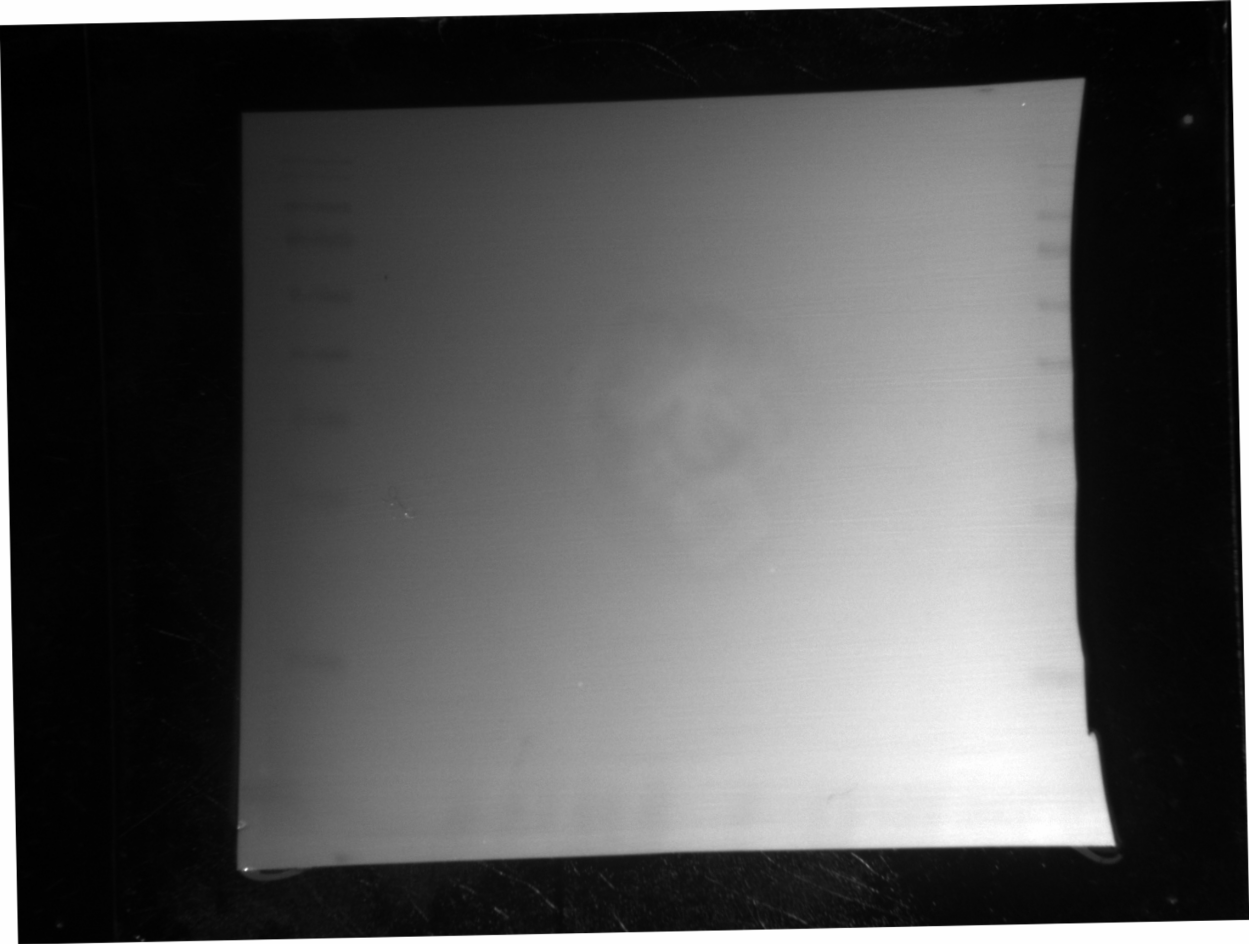


Gel bands of SERPINA3’s marker.


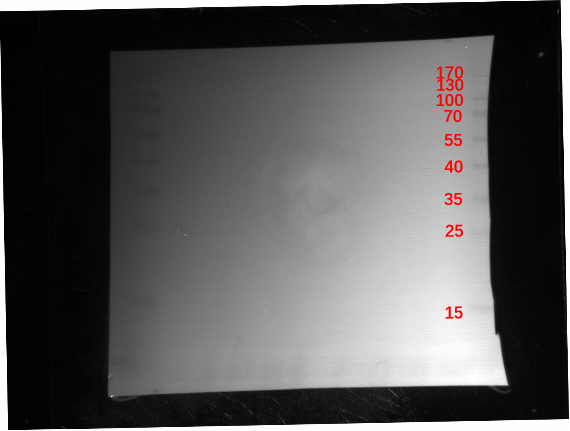


Gel bands of SERPINA3’s marker with label.


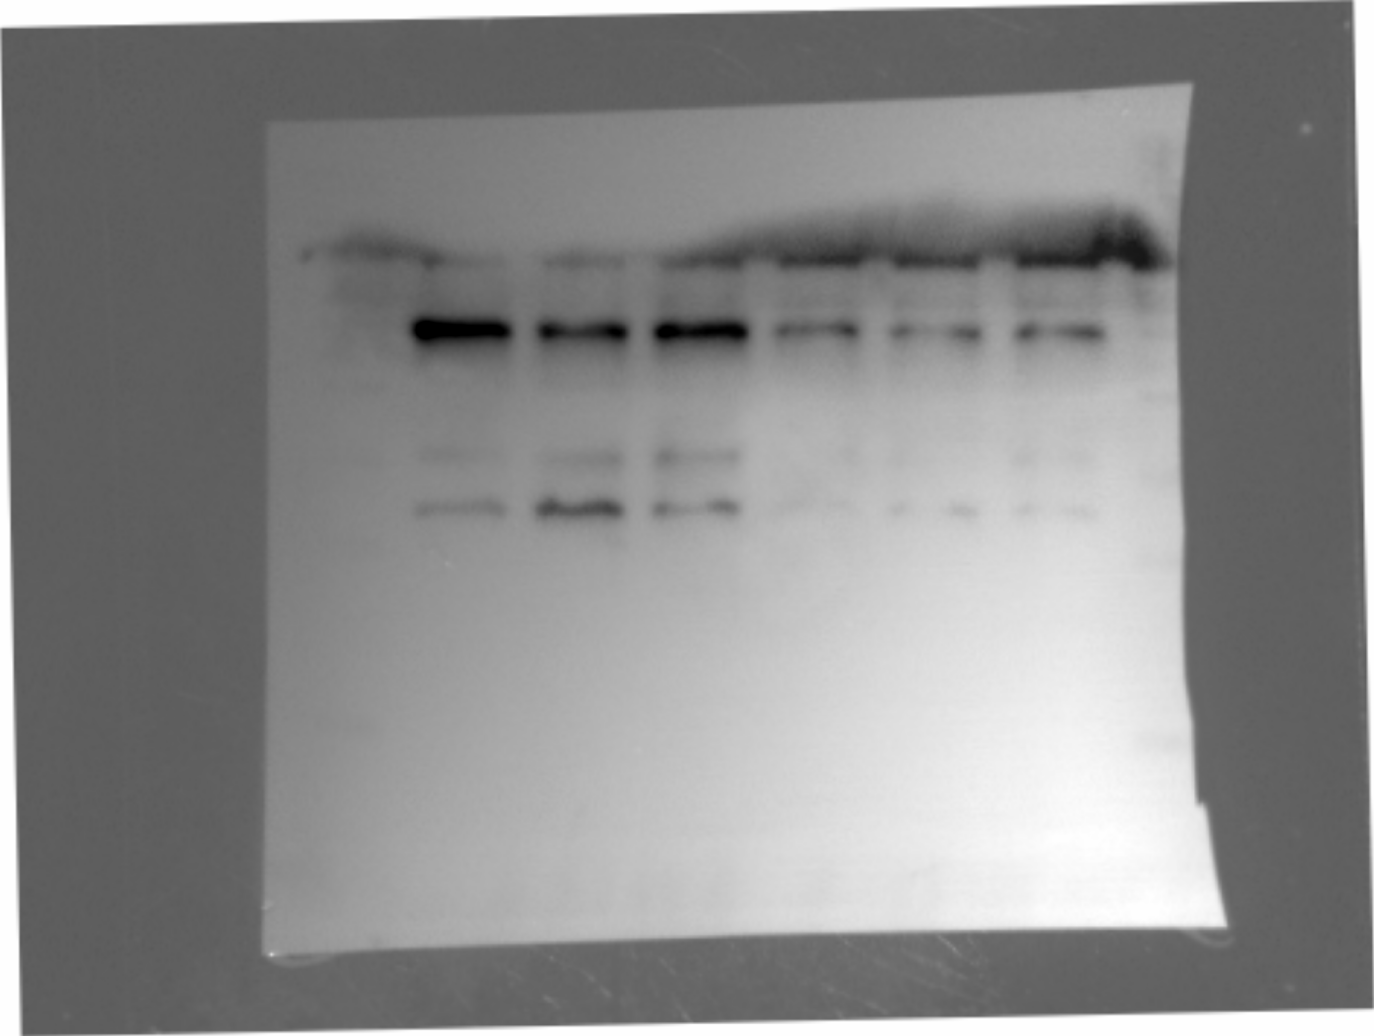


Gel bands of SERPINA3 merged with marker.
